# Supplementary material
Source: Springer Nature journal article supplement (https://www.springermedizin.de/resource/supplementary/12887_2013_1017_MOESM4_ESM.pdf/9477018)

**Average length of stay in general ward per individual by age**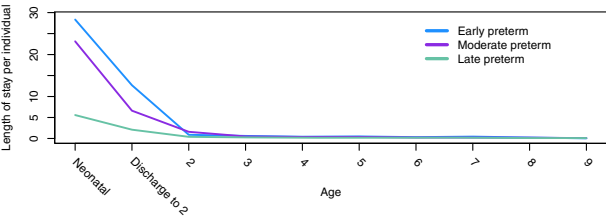**Average number of days in ICU per individual by age**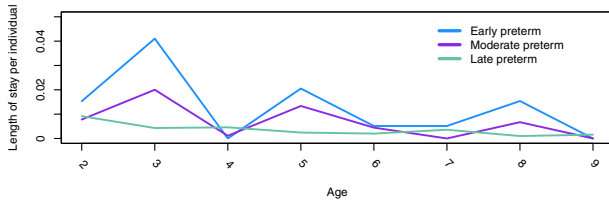**Average number of procedures per individual by age**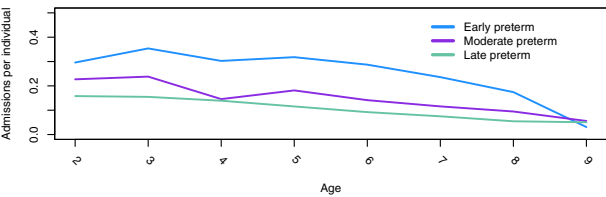**Average number of physician visits per individual by age**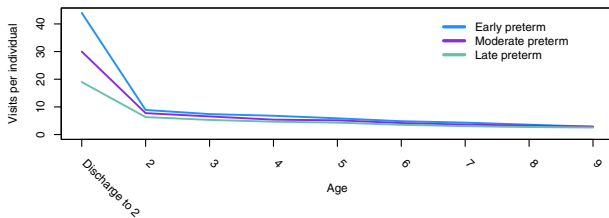**Average physician costs per individual by age**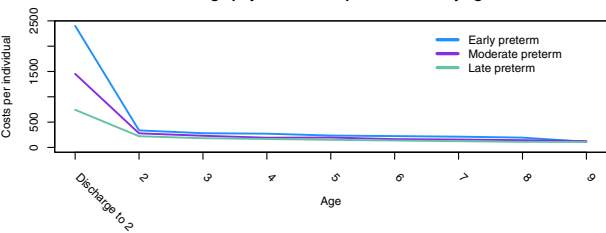

Supplement: MOESM4 [file 9477018]
